# Supplementary material for: Mitochondrial deficiency impairs hypoxic induction of HIF-1 transcriptional activity and retards tumor growth
Source: PubMed Central journal article supplement (PMC5355308; doi:10.18632/oncotarget.14415), 2017-01-02
Supplement: oncotarget-08-11841-s001.pdf [file oncotarget-08-11841-s001.pdf]

## **Mitochondrial deficiency impairs hypoxic induction of HIF-1 transcriptional activity and retards tumor growth**

### **SUPPLEMENTARY DATA**

### **SUPPLEMENTARY REFERENCES**

1. Elvidge GP, Glenny L, Appelhoff RJ, Ratcliffe PJ, Ragoussis J, Gleadle JM. Concordant regulation of gene expression by hypoxia and 2-oxoglutarate-dependent

dioxygenase inhibition: the role of HIF-1alpha, HIF-2alpha, and other pathways. *J Biol Chem.* 2006; 281: 15215–26. doi: 10.1074/jbc.M511408200.

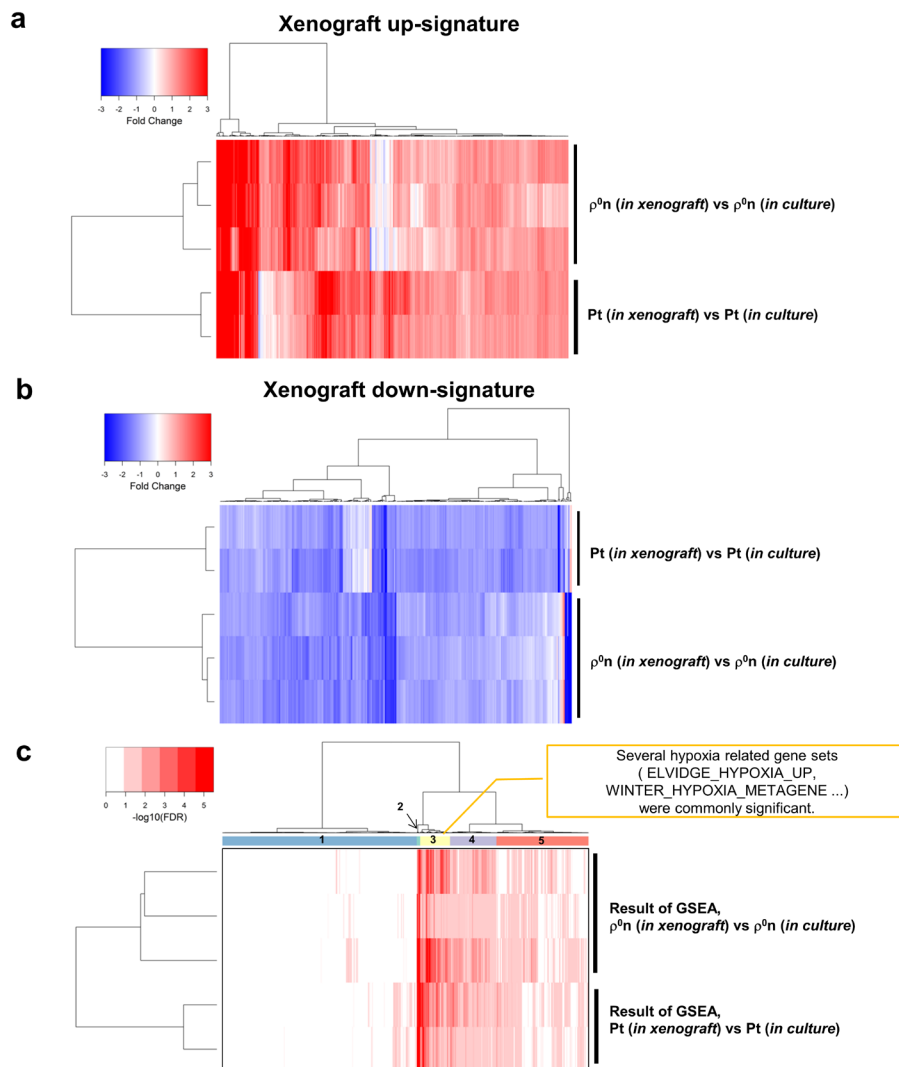

**Supplementary Figure 1: Similarity of gene expression change of HT-29 Pt cells or  $\rho^0n$  cells in xenograft with those in culture. a, b.** Signal intensity ratio of gene expression. HT-29 Pt and HT-29  $\rho^0n$  cells in xenograft were compared with those cells in culture, respectively. We selected 496 up-regulated probe sets (303 down-regulated probe sets) as follows:  
 Step 1. Selected commonly up-regulated (down-regulated) probe sets in two samples of xenografts of HT-29 Pt cells.  
 Step 2. Selected commonly up-regulated (down-regulated) probe sets in three samples of HT-29 Pt cell xenografts.  
 Step 3. Selected any of the probe sets in Steps 1 and 2 in each direction, and named them xenograft up-signature (down-signature).  
 Xenograft up-signature or down-signature were used in (a) and (b), respectively (see gene lists in Supplementary Table 10 and 11.).  
 c. Summary of GSEA comparing xenografts of HT-29 Pt or HT-29  $\rho^0n$  cells with those in culture, using the gene sets of MSigDB c2 collections. The log-scaled FDR of gene set enrichment was showed in the heat map with unsupervised clustering, where the numbers in the upper color bar indicate the clustered signatures. If the antilogarithm of FDR was 0, we replaced the value by the second smallest FDR.

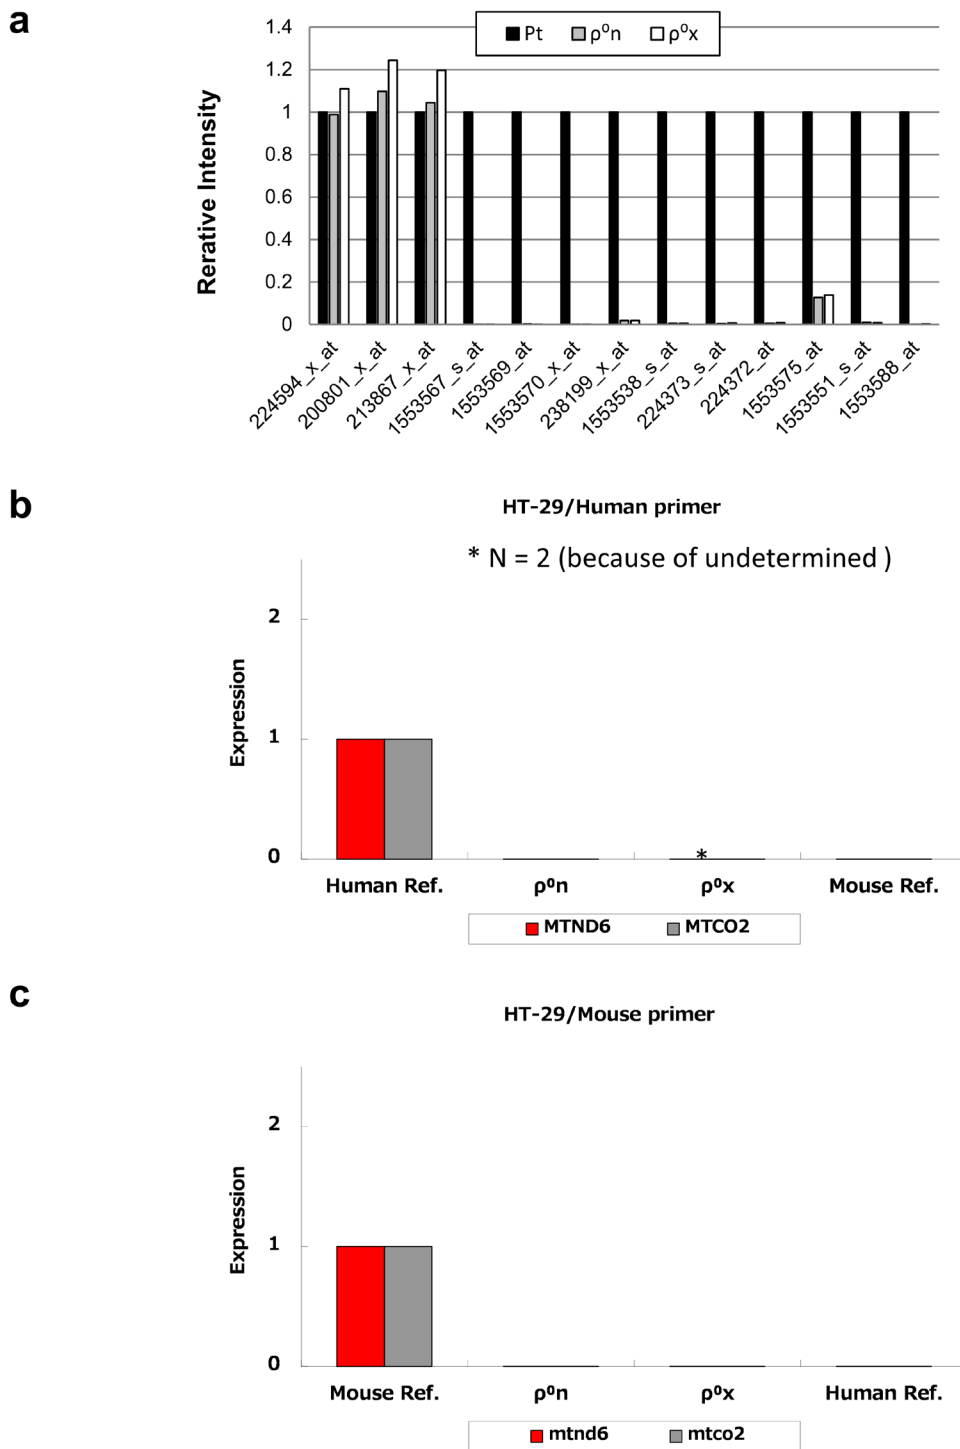

**Supplementary Figure 2: Absence of mtDNA in HT-29  $\rho^x$  cells.** **a.** Probe set of mtDNA in HT-29 cells. The signal intensity was normalized by HT-29 Pt cells. Probes representing 224594\_x\_at, 200801\_x\_at and 213867\_x\_at detected *ACTB*. Other probes detected several mtDNA genes (Supplementary Table 9). **b, c.** qRT-PCR analysis of *MTCO2*, using primers designed for human in (b) or mouse in (c). Expression levels were compared with reference RNA of human in (b) or mouse in (c). Error bars indicate SD, \* one sample was undetermined, because signal intensity was severely low.

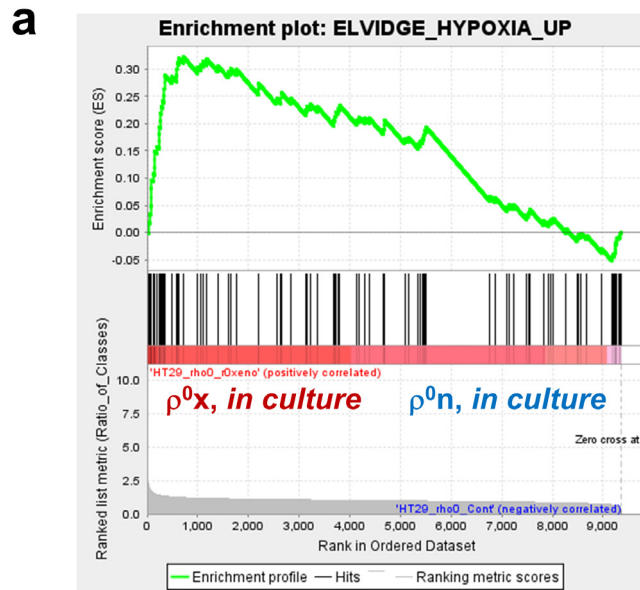

**Supplementary Figure 3: Enriched hypoxia-related signature in HT-29  $\rho^0x$  cells compared with HT-29  $\rho^0n$  cells.** Enrichment plot of GSEA, using a signature of 'ELVIDGE\_HYPOXIA\_UP', up-regulated in breast cancer MCF7 cells under hypoxic conditions [1]. Detail result of GSEA was shown in Supplementary Table 7 and 8.

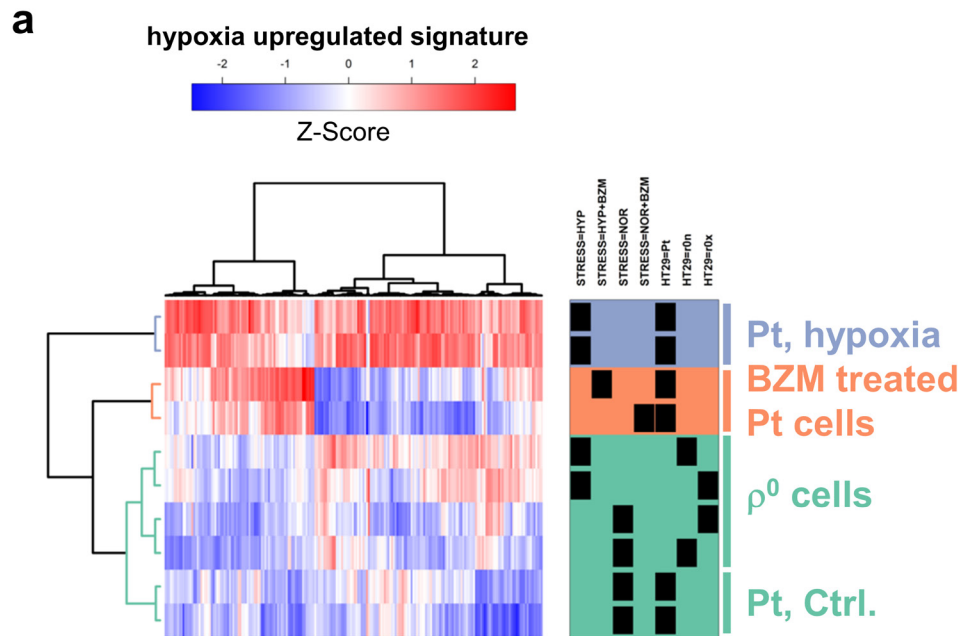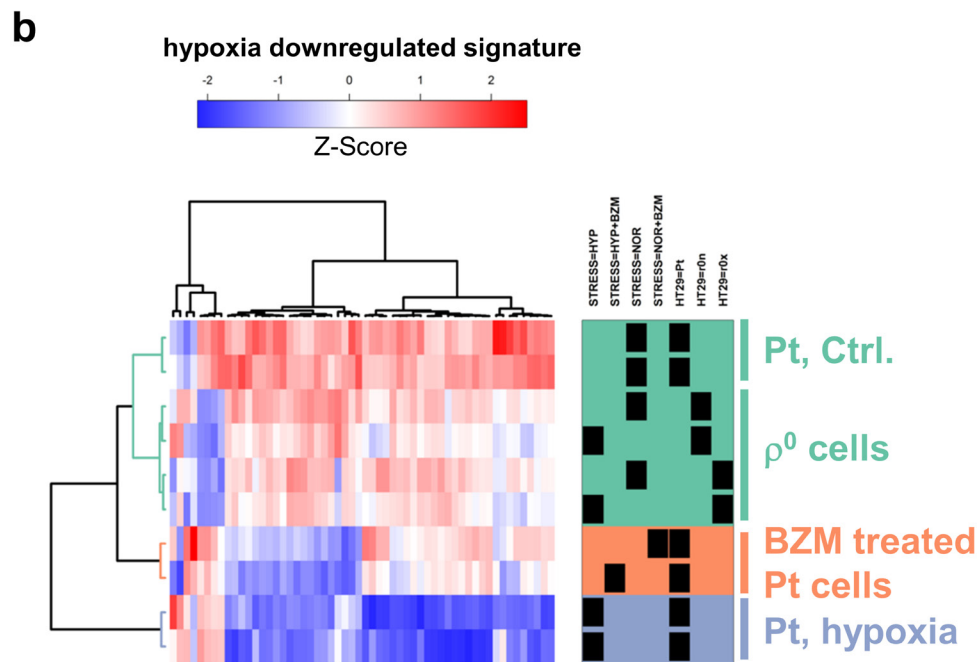

(Continued)

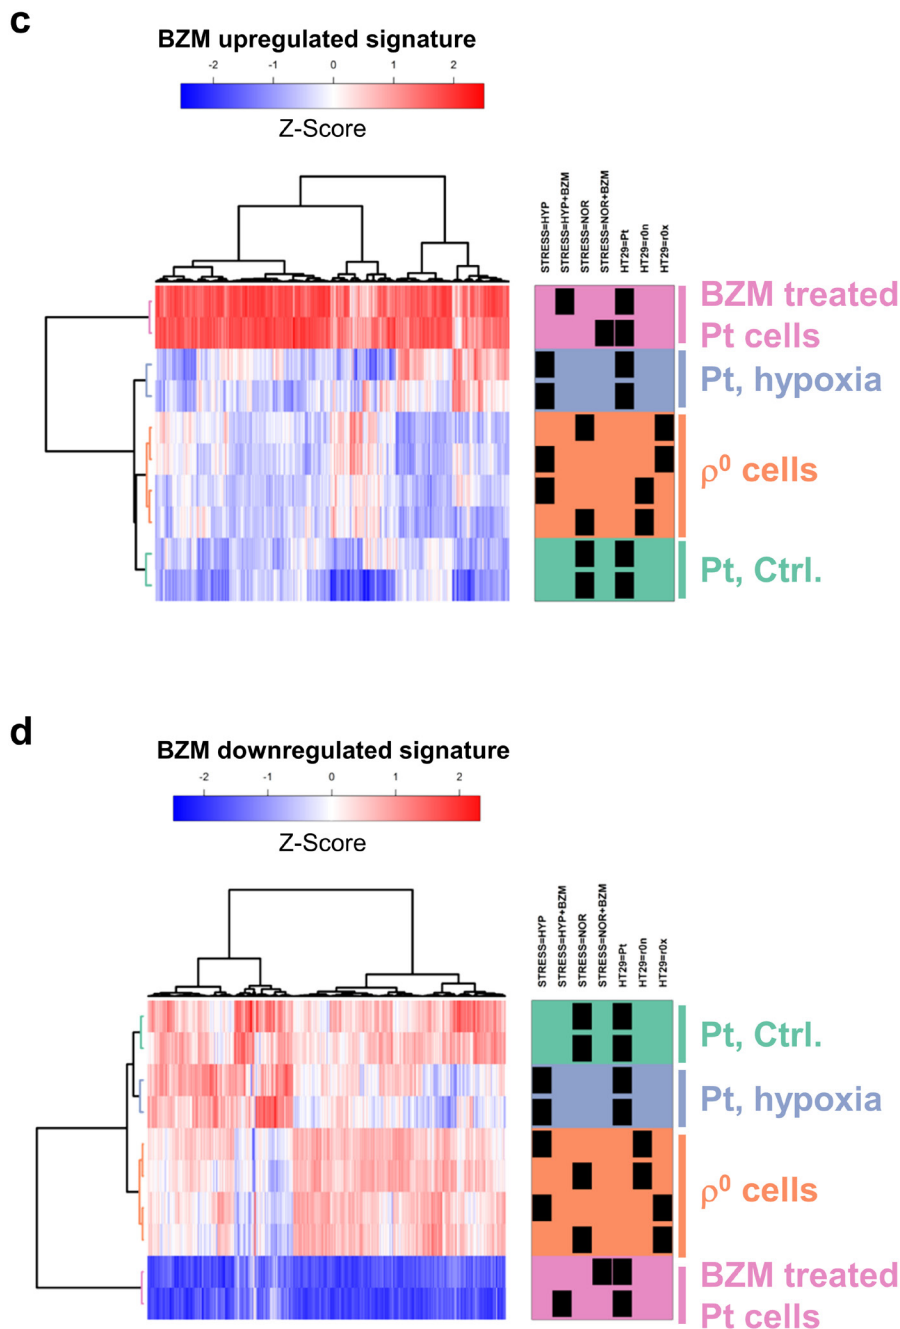

**Supplementary Figure 4: Gene expression levels of HT29 cells in hypoxia signature. a-d.** Gene expression levels of samples used in Figure 4 (b) and (c). Signal intensities were converted to a z-score by each probe and shown using an hypoxia upregulated signature in (a), hypoxia downregulated signature in (b), BZM upregulated signature in (c) and BZM downregulated signature in (d). Right panel shows the annotation of samples.

STRESS=HYP: cells were cultured under 18 hours of hypoxia.

STRESS=HYP+BZM: cells treated with bortezomib (BZM) were cultured under 18 hours of hypoxia.

STRESS=NOR: cells were cultured under 18 hours of normoxia.

STRESS=NOR+BZM: cells treated with bortezomib (BZM) were cultured under 18 hours of normoxia

HT29=Pt: HT-29 Pt cells.

HT29=r0n: HT-29  $\rho^0$ n cells.

HT29=r0x: HT-29  $\rho^0$ x cells.

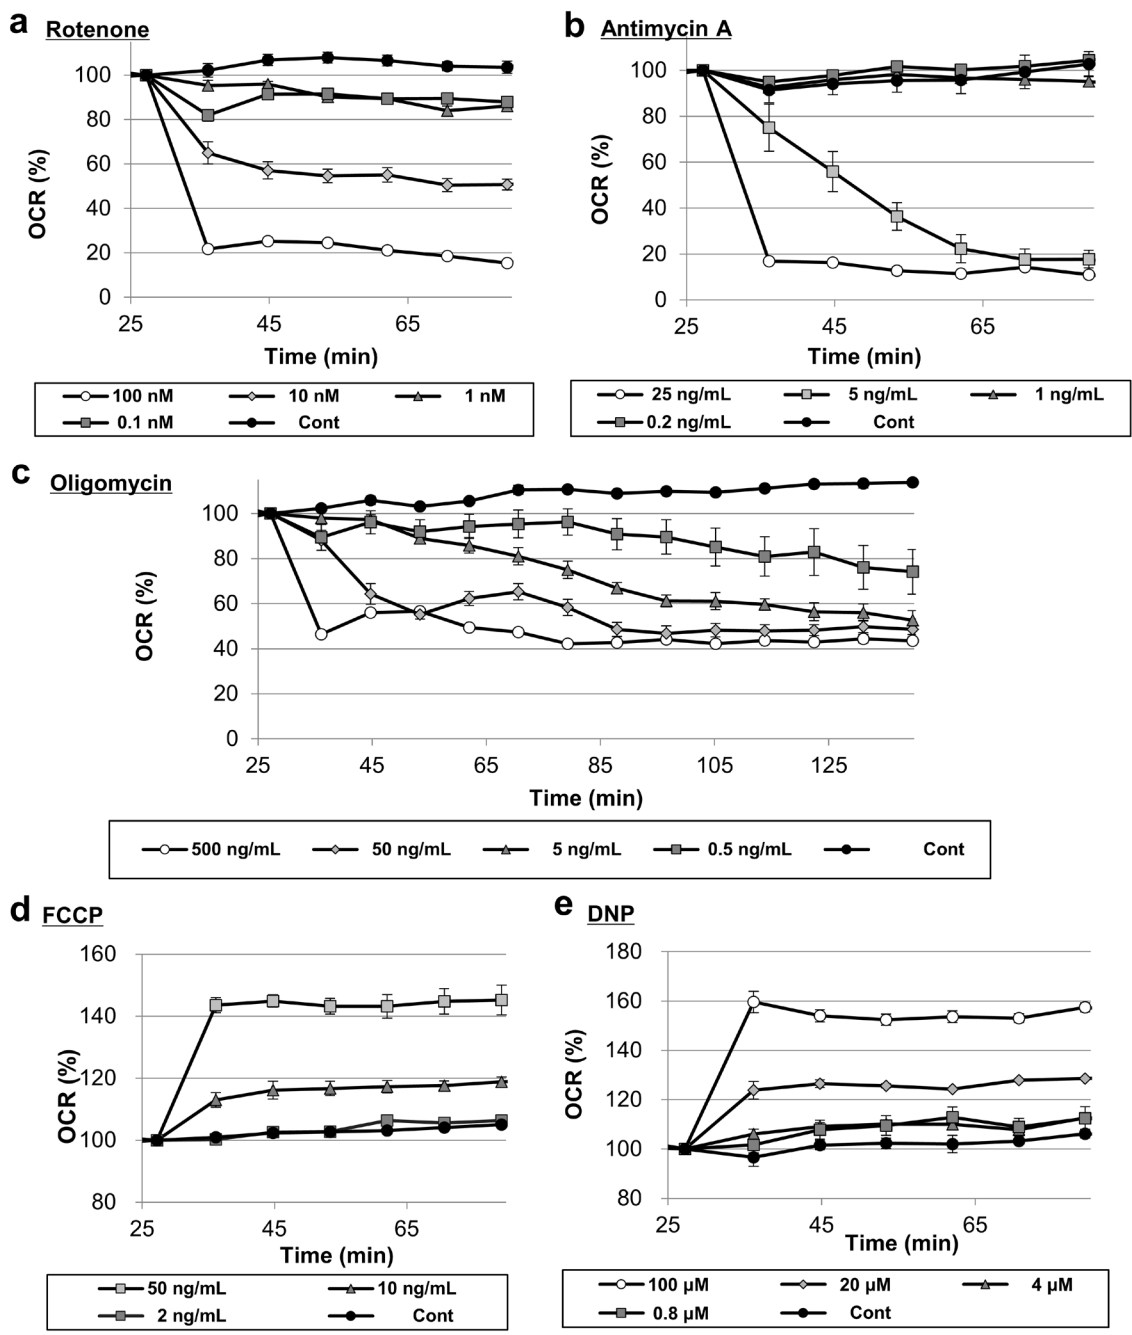

**Supplementary Figure 5: Inhibition of mitochondrial oxidative phosphorylation by several compounds.** Supporting information of Figure 5. a-e. OCR of HT-29 Pt cells was measured after treatment with the indicated concentrations of rotenone in (a), antimycin A in (b), oligomycin in (c), FCCP in (d) and DNP in (e). OCR was described as relative value to the untreated state.

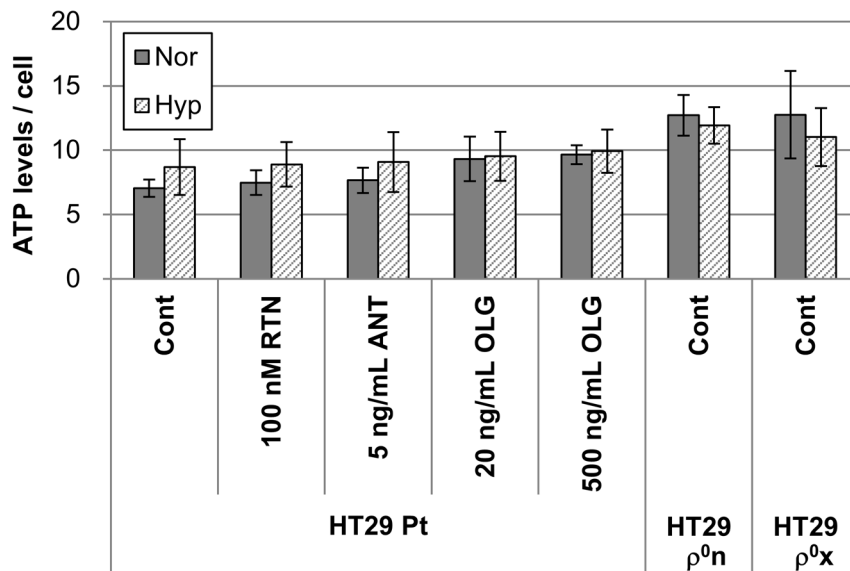

**Supplementary Figure 6: Keeping intra-cellular ATP levels under hypoxia with mitochondrial inhibition.** Intra-cellular ATP levels of HT-29 Pt, ρ<sup>0n</sup> and ρ<sup>0x</sup> cells, normalized by each cell numbers. Cells were treated with 18 hours hypoxia (Hyp) and normoxia (Nor). RTN, rotenone; ANT, antimycin A; OLG, oligomycin. Data were presented as mean ± SD of three independent experiments performed in triplicate.



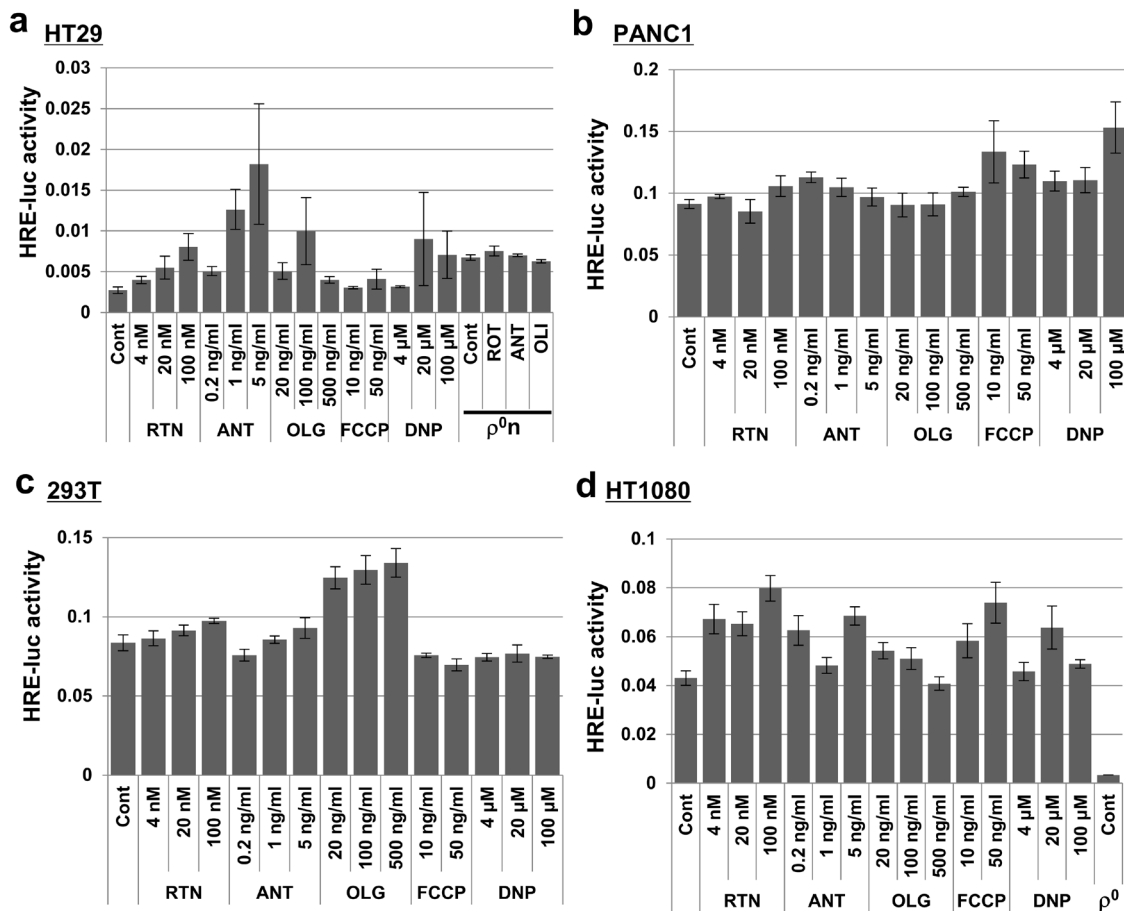

Supplementary Figure 7: HRE-luc activity treating mitochondrial inhibitors under normoxia. a-d. HRE-luc activity in HT-29 (a), PANC1 (b), 293T (c) and HT1080 cells (d) under normoxia. These data were from Figure 6a–d.

**Supplementary Table 1: Hypoxia up-regulated signature**

See Supplementary File 1

**Supplementary Table 2: Hypoxia down-regulated signature**

See Supplementary File 1

**Supplementary Table 3:  $\rho^0x$  Up-regulated signature**

See Supplementary File 1

Supplementary Table 4:  $\rho^0$ x Down-regulated signature

| Probe.ID     | NAME      |
|--------------|-----------|
| 1554997_a_at | PTGS2     |
| 1569454_a_at | LOC283352 |
| 202437_s_at  | CYP1B1    |
| 203065_s_at  | CAV1      |
| 203323_at    | CAV2      |
| 203324_s_at  | CAV2      |
| 203691_at    | PI3       |
| 203963_at    | CA12      |
| 204151_x_at  | AKR1C1    |
| 204446_s_at  | ALOX5     |
| 204508_s_at  | CA12      |
| 204588_s_at  | SLC7A7    |
| 204607_at    | HMGCS2    |
| 204748_at    | PTGS2     |
| 205111_s_at  | PLCE1     |
| 205919_at    | HBE1      |
| 206561_s_at  | AKR1B10   |
| 206737_at    | WNT11     |
| 207076_s_at  | ASS1      |
| 210145_at    | PLA2G4A   |
| 212097_at    | CAV1      |
| 219508_at    | GCNT3     |
| 221530_s_at  | BHLHE41   |
| 223204_at    | FAM198B   |
| 225270_at    | NEO1      |
| 226038_at    | LONRF1    |
| 230250_at    | PTPRB     |
| 242093_at    | SYTL5     |
| 41469_at     | PI3       |

The 29 probe sets down-regulated in HT-29  $\rho^0$ x cells compared with HT-29  $\rho^0$ n cells.

**Supplementary Table 5:  $\rho^0$ n\_vivo Up-regulated signature**

See Supplementary File 1

**Supplementary Table 6:  $\rho^0$ n\_vivo Down-regulated signature**

See Supplementary File 1

**Supplementary Table 7: Enrichment result, up-regulated c2 signatures in HT-29  $\rho^0$ x cells compared with in HT-29  $\rho^0$ n cells**

See Supplementary File 1

**Supplementary Table 8: Enrichment result, up-regulated c2 signatures in HT-29  $\rho^0$ n cells compared with in HT-29  $\rho^0$ x cells.**

See Supplementary File 1

**Supplementary Table 9: Probe sets recognizing mtDNA**

| <b>Probe.ID</b> | <b>NAME</b>          |
|-----------------|----------------------|
| 1553567_s_at    | ATP6                 |
| 1553569_at      | COX2                 |
| 1553570_x_at    | COX2                 |
| 238199_x_at     | COX3                 |
| 1553538_s_at    | COX1                 |
| 224373_s_at     | DCAF6///HNRNPM///ND4 |
| 224372_at       | DCAF6///ND4          |
| 1553575_at      | ND6                  |
| 1553551_s_at    | ND2                  |
| 1553588_at      | ND3///SH3KBP1        |

Supporting information of Supplementary Figure 2a. These probe sets recognize the mRNA of mtDNA.

**Supplementary Table 10: Xenograft up-regulated signature**

See Supplementary File 1

**Supplementary Table 11: Xenograft down-regulated signature**

See Supplementary File 1

**Supplementary Table 12: BZM upregulated signature**

See Supplementary File 1

**Supplementary Table 13: BZM downregulated signature**

See Supplementary File 1
